# Supplementary material for: Identification of genes involved in male sterility in wheat (Triticum aestivum L.) which could be used in a genic hybrid breeding system
Source: PubMed Central journal article supplement (PMC7063588; doi:10.1002/pld3.201), 2020-03-10
Supplement: PLD3-4-e00201-s004.pdf [file PLD3-4-e00201-s004.pdf]

A

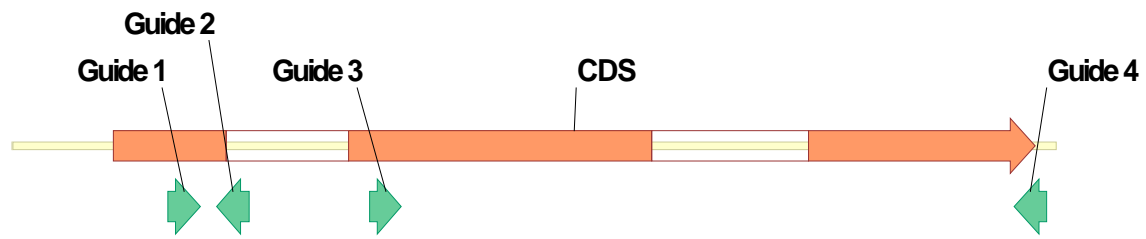

TaRPG1-A partial genomic region  
745 bp

B

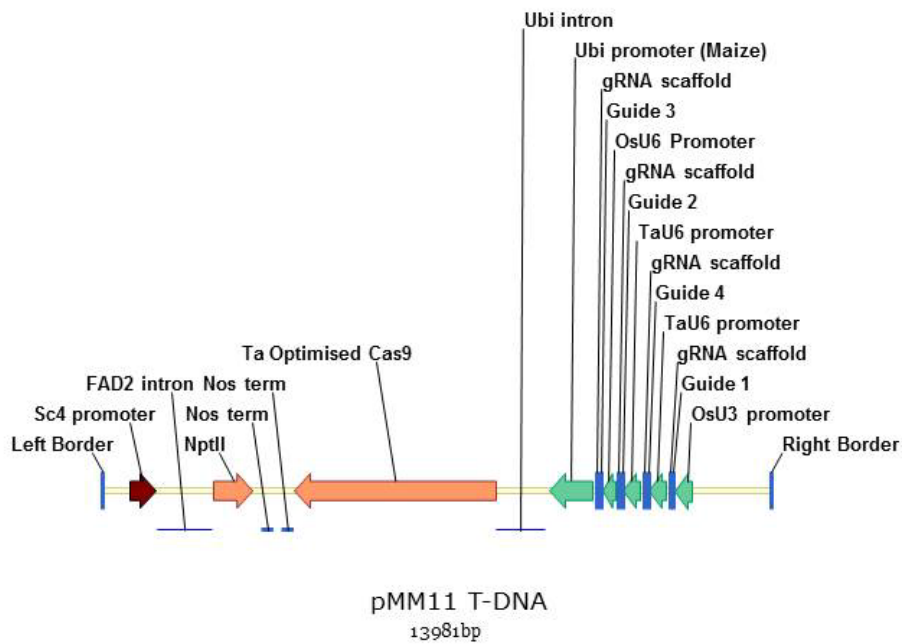

pMM11 T-DNA  
13981bp

Supplemental Figure 4: *TaRPG1* CRISPR guide location and pMM11 T-DNA structure. A Partial genomic region of *TaRPG1-A* showing the orientation of the partial CDS covering exons 1-3 (orange blocks and arrow) and location of CRISPR guide target sequences (green arrows). B Schematic of the pMM11 binary plasmid T-DNA region transferred to wheat.
