# Supplementary material for: Identification of genes involved in male sterility in wheat (Triticum aestivum L.) which could be used in a genic hybrid breeding system
Source: PubMed Central journal article supplement (PMC7063588; doi:10.1002/pld3.201), 2020-03-10

Supplemental Figure 11: Predicted amino acid consequences of the CRISPR Cas9 mutations in the *TaCa155-D* homoeologue of all of the sterile plants produced.

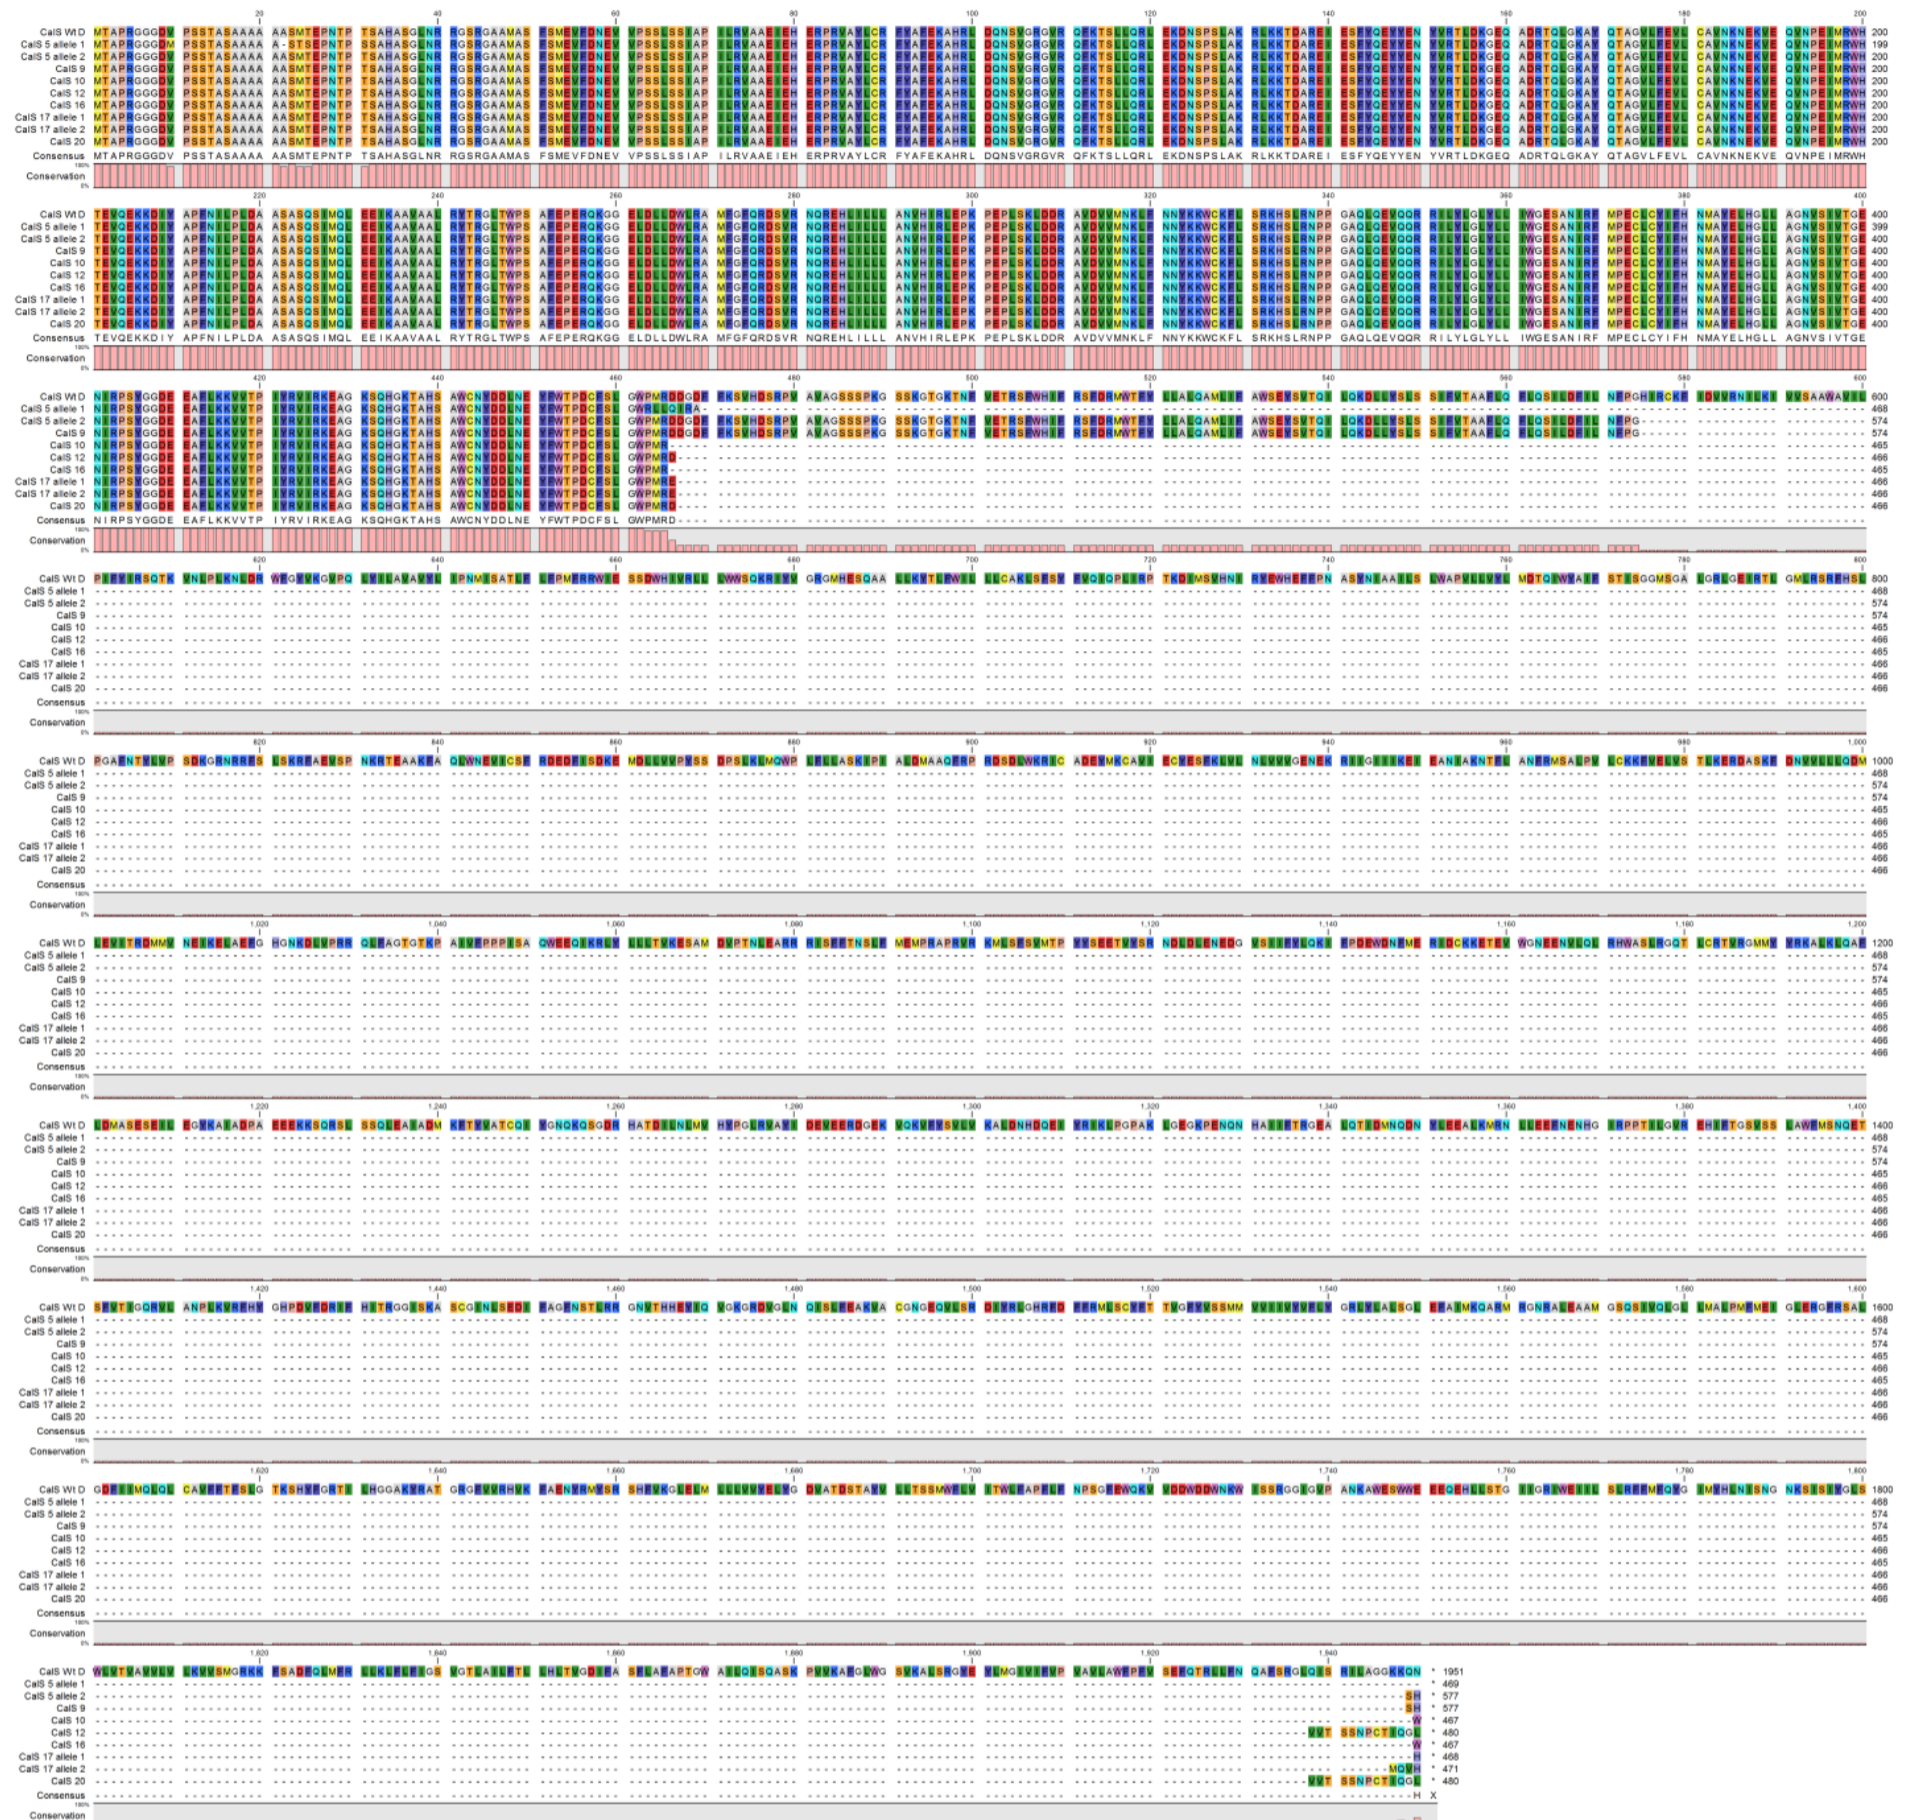

Supplement: PLD3-4-e00201-s011.pdf [file PLD3-4-e00201-s011.pdf]
